# Supplementary material for: Tunisian Multicenter Study on the Prevalence of Colistin Resistance in Clinical Isolates of Gram Negative Bacilli: Emergence of Escherichia coli Harbouring the mcr-1 Gene
Source: MDPI journal article supplement (doi:10.3390/antibiotics11101390), 2022-10-11
Supplement: s1 [file s1]

Table S1. Oligonucleotides used in this study.

| Gene                                                                                                     | Primer <sup>a</sup> | Sequence (5'–3') <sup>c</sup> | Product Size (bp) <sup>b</sup> | Reference |
|----------------------------------------------------------------------------------------------------------|---------------------|-------------------------------|--------------------------------|-----------|
| ACC-1 and ACC-2                                                                                          | ACC-F               | CACCTCCAGCGACTTGTTAC          | 346                            | [16]      |
|                                                                                                          | ACC-R               | GTTAGCCAGCATCACGATCC          |                                |           |
| FOX-1 à FOX-5                                                                                            | FOX-F               | CTACAGTGC GGGTGGTTT           | 162                            |           |
|                                                                                                          | FOX-R               | CTATTTGCGGCCAGGTGA            |                                |           |
| MOX-1, MOX-2, CMY-1, CMY-8 to CMY-11 and CMY-19                                                          | MOX-F               | GCAACAACGACAATCCATCCT         | 895                            |           |
|                                                                                                          | MOX-R               | GGGATAGGCGTAACTCTCCCAA        |                                |           |
| DHA-1 and DHA-2                                                                                          | DHA-F               | TGATGGCACAGCAGGATATTC         | 997                            |           |
|                                                                                                          | DHA-R               | GCTTTGACTCTTTTCGGTATTCTG      |                                |           |
| LAT-1 to LAT-3, BIL-1, CMY-2 to CMY-7, CMY-12 to CMY-18 and CMY-21 to CMY-23                             | CIT-F               | CGAAGAGGCAATGACCAGAC          | 538                            |           |
|                                                                                                          | CIT-R               | ACGGACAGGGTTAGGATAGY          |                                |           |
| ACT-1 and MIR-1                                                                                          | EBC-F               | CGGTAAAGCCGATGTTGCG           | 683                            |           |
|                                                                                                          | EBC-R               | AGCCTAACCCCTGATACA            |                                |           |
| <i>mcr-1</i> <sup>*</sup>                                                                                | CLR-F               | C GGT CAGTCCGTTTGTTC          | 309                            |           |
|                                                                                                          | CLR-R               | CTTGGTCGGTCTGTAGGG            |                                |           |
| <i>mcr-2</i>                                                                                             | Mcr-2-F             | CAAGTGTGTTGGTCGCAGTT          | 715                            |           |
|                                                                                                          | Mcr-2-R             | TCTAGCCCCGACAAGCATACC         |                                |           |
| <i>mcr-3</i>                                                                                             | Mcr-3-F             | AAATAAAAATTGTTCCGCTTATG       | 929                            | [4]       |
|                                                                                                          | Mcr-3-R             | AATGGAGATCCCCGTTTTT           |                                |           |
| <i>mcr-4</i>                                                                                             | Mcr-4-F             | TCACTTTCATCACTGCGTTG          | 1116                           |           |
|                                                                                                          | Mcr-4-R             | TTGGTCCATGACTACCAATG          |                                |           |
| <i>mcr-5</i>                                                                                             | Mcr-5-F             | ATGCGGTTGTCTGCATTTATC         | 1644                           |           |
|                                                                                                          | Mcr-5-R             | TCATTGTGGTTGTCTTTTCTG         |                                |           |
| <i>mcr-6</i>                                                                                             | mcr-6-F             | AGCTATGTCAATCCCGTGAT          | 252                            |           |
|                                                                                                          | mcr-6-R             | ATTGGCTAGGTTGTCAATC           |                                |           |
| <i>mcr-7</i>                                                                                             | mcr-7-F             | GCCCTTCTTTTCGTTGTT            | 551                            | [14]      |
|                                                                                                          | mcr-7-R             | GGTTGGTCTCTTTCTCGT            |                                |           |
| <i>mcr-8</i>                                                                                             | mcr-8-F             | TCAACAATTCTACAAAGCGTG         | 856                            |           |
|                                                                                                          | mcr-8-R             | AATGCTGCGCGAATGAAG            |                                |           |
| <i>mcr-9</i>                                                                                             | mcr-9-F             | TTCCCTTTGTTCTGGTTG            | 1011                           |           |
|                                                                                                          | mcr-9-R             | GCAGGTAATAAGTCGGTC            |                                |           |
| <i>bla</i> <sub>IMP</sub>                                                                                | IMP-F               | GGAATAGAGTGGCTTAAYTCTC        | 232                            | [17]      |
|                                                                                                          | IMP-R               | GGTTTAAYAAAACAACCACC          |                                |           |
| <i>bla</i> <sub>NDM</sub>                                                                                | NDM-F               | GGTTTGGCGATCTGGTTTTTC         | 621                            |           |
|                                                                                                          | NDM-R               | CGGAATGGCTCATCACGATC          |                                |           |
| <i>bla</i> <sub>KPC</sub>                                                                                | KPC-F               | CGTCTAGTTCTGCTGTCTTG          | 798                            |           |
|                                                                                                          | KPC-R               | CTTGTCATCCTTGTTAGGCG          |                                |           |
| <i>bla</i> <sub>OXA-48</sub>                                                                             | OXA-48-F            | GCGTGGTTAAGGATGAACAC          | 438                            |           |
|                                                                                                          | OXA-48-R            | CATCAAGTTCAACCCAACCG          |                                |           |
| <i>bla</i> <sub>GES</sub>                                                                                | GES-F               | AGTCGGCTAGACCGGAAAG           | 399                            |           |
|                                                                                                          | GES-R               | TTTGTCCGTGCTCAGGAT            |                                |           |
| <i>bla</i> <sub>TEM</sub> variants including <i>bla</i> <sub>TEM-1</sub> and <i>bla</i> <sub>TEM-2</sub> | MultiTSO-T-F        | CATTTCCGTGTCGCCCTTATTC        | 800                            | [16]      |
|                                                                                                          | MultiTSO-T-R        | CGTTCATCCATAGTTGCCTGAC        |                                |           |
| <i>bla</i> <sub>SHV</sub> variants including <i>bla</i> <sub>SHV-1</sub>                                 | MultiTSO-S-F        | AGCCGCTTGAGCAAATTAAAC         | 713                            |           |
|                                                                                                          | MultiTSO-S-R        | ATCCCGCAGATAAATCACCAC         |                                |           |

|                                                                                                                                                                      |              |                                  |      |
|----------------------------------------------------------------------------------------------------------------------------------------------------------------------|--------------|----------------------------------|------|
| <i>bla</i> <sub>OXA-1</sub> , <i>bla</i> <sub>OXA-4</sub> and <i>bla</i> <sub>OXA-30</sub>                                                                           | MultiTSO-O-F | GGCACCAGATTCAACTTTCAAG           | 564  |
|                                                                                                                                                                      | MultiTSO-O-R | GACCCCAAGTTTCCTGTAAGTG           |      |
| variants of <i>bla</i> <sub>CTX-M</sub> group 1 including <i>bla</i> <sub>CTX-M-1</sub> , <i>bla</i> <sub>CTX-M-3</sub> and <i>bla</i> <sub>CTX-M-15</sub>           | CTXMGp1-F    | TTAGGAARTGTGCCGCTGYAb            | 688  |
|                                                                                                                                                                      | CTXMGp1-2-R  | CGATATCGTTGGTGGTRCCATb           |      |
| variants of <i>bla</i> <sub>CTX-M</sub> group 2 including <i>bla</i> <sub>CTX-M-2</sub>                                                                              | CTXMGp2-F    | CGTTAACGGCACGATGAC               | 404  |
|                                                                                                                                                                      | CTXMGp1-2-R  | CGATATCGTTGGTGGTRCCATb           |      |
| variants of <i>bla</i> <sub>CTX-M</sub> group 9 including <i>bla</i> <sub>CTX-M-9</sub> and <i>bla</i> <sub>CTX-M-14</sub>                                           | CTXMGp9-F    | TCAAGCCTGCCGATCTGGT              | 561  |
|                                                                                                                                                                      | CTXMGp9-R    | TGATTCTCGCCGCTGAAG               |      |
| <i>bla</i> <sub>CTX-M-8</sub> , <i>bla</i> <sub>CTX-M-25</sub> , <i>bla</i> <sub>CTX-M-26</sub> and <i>bla</i> <sub>CTX-M-39</sub> to <i>bla</i> <sub>CTX-M-41</sub> | CTX-Mg8/25-F | AACRCRCAGACGCTCTACb              | 326  |
|                                                                                                                                                                      | CTX-Mg8/25-R | TCGAGCCGGAASGTGTyATb             |      |
| <i>chuA</i>                                                                                                                                                          | chuA.1b      | ATGGTACCGGACGAACCAAC             | 288  |
|                                                                                                                                                                      | chuA.2       | TGCCGCCAGTACCAAAGACA             |      |
| <i>yjaA</i>                                                                                                                                                          | yjaA.1b      | CAAACGTGAAGTGTcAGGAG             | 211  |
|                                                                                                                                                                      | yjaA.2b      | AATGCGTTCCTCAACCTGTG             |      |
| TspE4C2                                                                                                                                                              | TspE4C2.1b   | CACTATTCGTAAGGTCATCC             | 152  |
|                                                                                                                                                                      | TspE4C2.2b   | AGTTTATCGCTGCGGGTCGC             |      |
| <i>arpA</i>                                                                                                                                                          | AceK.f       | AACGCTATTcGCCAGCTTGC             | 400  |
|                                                                                                                                                                      | ArpA1.r      | TCTCCCCATACCGTACGCTA             |      |
| <i>arpA</i>                                                                                                                                                          | ArpAgpE.f    | GATTCCATCTTGTCAAAATATGC<br>C     | 301  |
|                                                                                                                                                                      | ArpAgpE.r    | GAAAAGAAAAAGAATTCCCAAG<br>AG     |      |
| <i>trpA</i>                                                                                                                                                          | trpAgpC.1    | AGTTTTATGCCcAGTGCGAG             | 219  |
|                                                                                                                                                                      | trpAgpC.2    | TCTGCGCCGGTCACGCCC               |      |
| <i>trpA</i> (contrôle interne)                                                                                                                                       | trpBA.f      | CGGCGATAAAAGACATCTTCAC           | 489  |
|                                                                                                                                                                      | trpBA.r      | GCAACGCGGCCTGGCGGAAG             |      |
| <i>int1</i>                                                                                                                                                          | int1-F       | GGG TCA AGG ATC TGG ATT TCG      | 438  |
|                                                                                                                                                                      | int1-R       | ACA TGC GTG TAA ATC ATC GTC<br>G |      |
| <i>int2</i>                                                                                                                                                          | Int2-F       | CAC GGA TAT GCG ACA AAA<br>AGG T | 788  |
|                                                                                                                                                                      | Int2-R       | GTA GCA AAC GAG TGA CGA<br>AAT G |      |
| <i>int3</i>                                                                                                                                                          | Int3-F       | GCC TCC GGC AGC GAC TTT CAG      | 500  |
|                                                                                                                                                                      | Int3-R       | ACG GAT CTG CCA AAC CTG ACT      |      |
|                                                                                                                                                                      | MCR1-END-F   | GTGCGAACATCAGTCCTTGA             | [6]  |
|                                                                                                                                                                      | PAP2-INT-R   | CGCAACCAGCAAGTAGATCA             |      |
| ISAp11                                                                                                                                                               | ISAp11-mcr-F | TGGACATTGGGAAGCCGATA             | [15] |
|                                                                                                                                                                      | ISAp11-mcr-R | GCCA CAAGAACAAACGGACT            |      |
| IncB/O                                                                                                                                                               | B/O-F        | GCGGTCCGGAAGCCAGAAAAC            | 159  |
|                                                                                                                                                                      | B/O-R        | TCTGCGTTCGCCAAGTTCGA             |      |
| IncFIC                                                                                                                                                               | FIC-F        | GTGAACTGGCAGATGAGGAAGG           | 262  |
|                                                                                                                                                                      | FIC-R        | TTCTCCTCGTCGCCAACTAGAT           |      |
| IncA/C                                                                                                                                                               | A/C-F        | GAGAACCAAAGACAAAGACCTG<br>GA     | 465  |
|                                                                                                                                                                      | A/C-R        | ACGACAAACCTGAATTGCCTCCT<br>T     |      |

|         |        |                                   |     |
|---------|--------|-----------------------------------|-----|
| IncP    | P-F    | CTATGGCCCTGCAAACGCGCCA<br>GAAA    | 534 |
|         | P-R    | TCACGCGCCAGGGCGCAGCC              |     |
| IncT    | T-F    | TTGGCCTGTTTGTGCCTAAAC<br>CAT      | 750 |
|         | T-R    | CGTTGATTACACTTAGCTTTGGA<br>C      |     |
| IncK/B  | K/B-F  | GCGGTCCGGAAGCCAGAAAAC             | 160 |
|         | K/B-R  | TCTTTCACGAGCCCGCCAAA              |     |
| IncW    | W-F    | CCTAAGAACAACAAAGCCCCCG            | 242 |
|         | W R    | GGTGCGCGGCATAGAACCGT              |     |
| IncFIIA | FIIA-F | CTGTCGTAAGCTGATGGC                | 270 |
|         | FIIA-R | CTCTGCCACAACTTCAGC                |     |
| IncFIA  | FIA F  | CCATGCTGGTTCTAGAGAAGGTG           | 462 |
|         | FIA R  | GTATATCCTTACTGGCTTCCGCAG          |     |
| IncFIB  | FIB-F  | GGAGTTCTGACACACGATTTTCT<br>G      | 702 |
|         | FIB R  | CTCCCGTCGCTTCAGGGCATT             |     |
| IncY    | Y F    | AATTCAAACAACACTGTGCAGCC<br>TG     | 765 |
|         | Y-R    | GCGAGAATGGACGATTACAAAA<br>CTTT    |     |
| IncI1   | I1-F   | CGAAAGCCGGACGGCAGAA               | 139 |
|         | I1-R   | TCGTCGTTCCGCCAAGTTCGT             |     |
| Frep    | Frep F | TGATCGTTTAAGGAATTTTG              | 270 |
|         | Frep-R | GAAGATCAGTCACACCATCC              |     |
| IncX    | X-F    | AACCTTAGAGGCTATTTAAGTTG<br>CTGAT  | 376 |
|         | X-R    | TGAGAGTCAATTTTATCTCATGT<br>TTTAGC |     |
| IncHI1  | HI1-F  | GGAGCGATGGATTACTTCAGTAC           | 471 |
|         | HI1-R  | TGCCGTTTCACCTCGTGAGTA             |     |
| IncN    | N-F    | GTCTAACGAGCTTACCGAAG              | 559 |
|         | N-R    | GTTTCAACTCTG CCAAGTTC             |     |
| IncHI2  | HI2-F  | TTTCTCCTGAGTCACCTGTTAACAC         | 644 |
|         | HI2 R  | GGCTCACTACCGTTGTCATCCT            |     |
| IncL/M  | L/M-F  | GGATGAAAACATCAGCATCTGA<br>AG      | 785 |
|         | L/M-R  | CTGCAGGGGCGATTCTTTAGG             |     |

<sup>a</sup> F, sense primer; R, antisense primer. <sup>b</sup> Nucleotide numbering begins at the initiation codons of genes. <sup>c</sup> D = A or G or T; Y = C or T.
